# Supplementary material for: Preparation of new diazene complexes of ruthenium and osmium
Source: Royal Society of Chemistry journal article supplement (doi:10.1039/b202888n), 2002-01-01
Supplement: b202888n-1.pdf [file b202888n-1.pdf]

Author: G. Albertin et al.

Title: Preparation of new diazene complexes of ruthenium and osmium

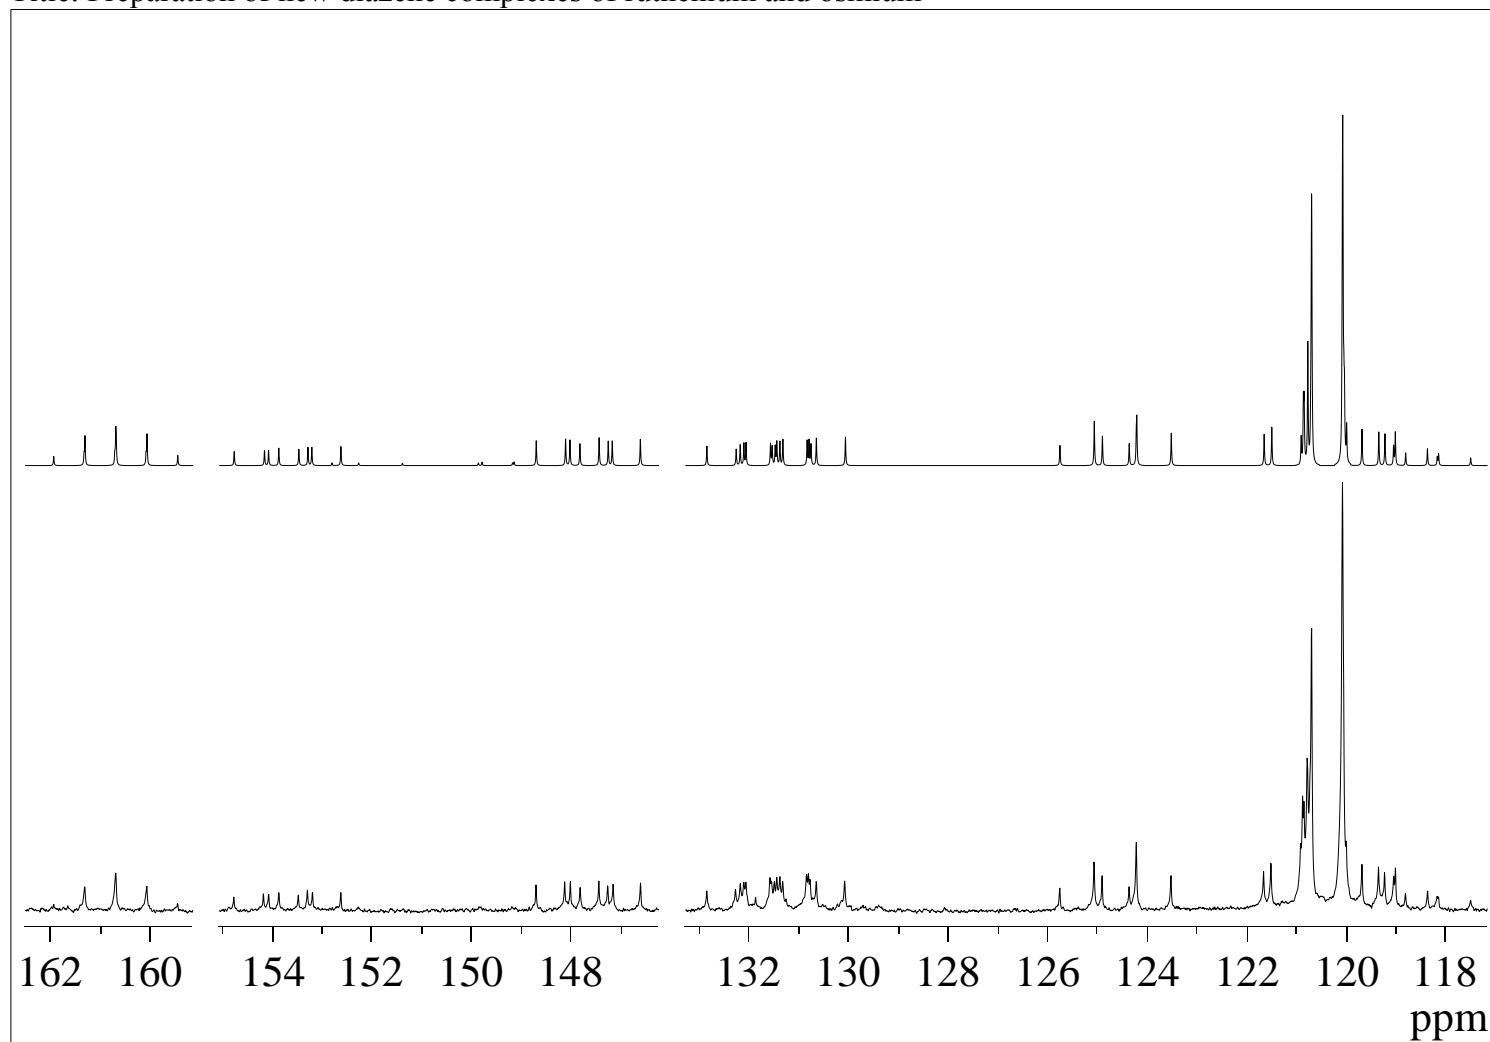

**Figure S1:** Observed (bottom) and calculated (top)  $^{31}\text{P}\{^1\text{H}\}$  NMR spectra of compound  $[\text{Ru}(\text{NH}_2\text{NH}_2)\{\text{PPh}(\text{OEt})_2\}\{\text{P}(\text{OEt})_3\}_4](\text{BPh}_4)_2$  **2** (two isomers).
