# Supplementary material for: Preparation of new diazene complexes of ruthenium and osmium
Source: Royal Society of Chemistry journal article supplement (doi:10.1039/b202888n), 2002-01-01
Supplement: b202888n-2.pdf [file b202888n-2.pdf]

**SUPPLEMENTARY INFORMATION**

Author: G. Albertin et al.

Title: Preparation of new diazene complexes of ruthenium and osmium

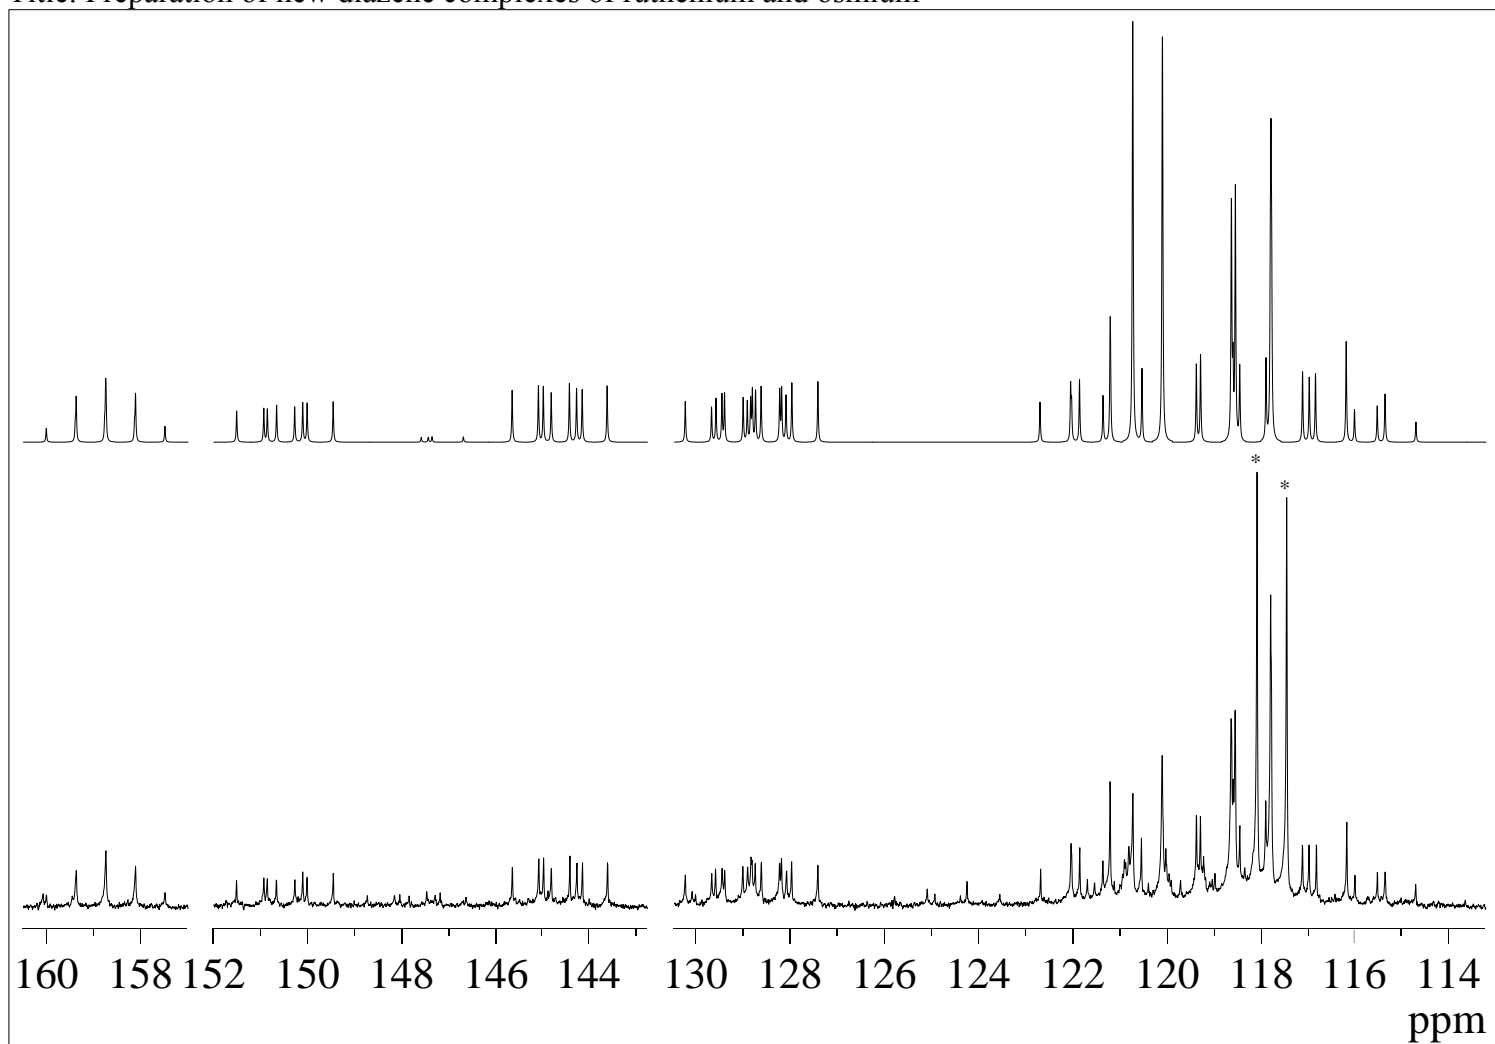

Supplementary Material (ESI) for Dalton Transactions  
This journal is © The Royal Society of Chemistry 2002

**Figure S2:** Observed (bottom) and calculated (top)  $^{31}\text{P}\{^1\text{H}\}$  NMR spectra of compound  $[\text{Ru}(\text{NH}=\text{NH})\{\text{PPh}(\text{OEt})_2\}\{\text{P}(\text{OEt})_3\}_4](\text{BPh}_4)_2$  **4** (two isomers). The signals indicated by the asterisks are due to an impurity.
